# Supplementary material for: Steroid hormones content and proteomic analysis of canine follicular fluid during the preovulatory period
Source: Reprod Biol Endocrinol. 2010 Nov 1;8:132. doi: 10.1186/1477-7827-8-132 (PMC2990747; doi:10.1186/1477-7827-8-132)
Supplement: Additional file 1 — Supplemental Table 1: Characteristics of different fragments of albumin (ALB) and immunoglobulin heavy chain. [file 1477-7827-8-132-S1.XLS]

## Sheet: Sheet1
Additional file 1, Supplemental Table 1. Characteristics of different fragments of albumin (ALB) and immunoglobulin heavy chain
Gene	AC1 N°	Protein name	Exp2	Theo2	Score3	P N°2	SC (%)4
			pI2 /Mr2
ALB*	P49822	Albumin	5,44/73	5.41/68	294.32	31	43.1
ALB	P49822	Albumin	5,07/67	5.41/68	232.31	24	36.5
ALB	P49822	Albumin	6,22/61	5.41/68	18.24	2	3
ALB	P49822	Albumin	6,41/58	5.41/68	46.26	5	12.7
ALB	P49822	Albumin	6,82/55	5.41/68	18.25	2	23.5
ALB	P49822	Albumin	6,08/45	5.41/68	18.26	2	6.4
ALB**	P49822	Albumin	10,67/69	5.41/68	158.28	17	27.6
ALB**	P49822	Albumin	10,07/69	5.41/68	158.25	17	28.3
ALB	P49822	Albumin	5,36/36	5.41/68	10.25	1	3.5
ALB	P49822	Albumin	5,54/34	5.41/68	18.26	2	5.6
ALB	P49822	Albumin	6,78/28	5.41/68	116.28	12	23.5
HV01*	P01784	Ig heavy chain V region GOM	6,32/48	5.08/12	18.26	2	16.7
HV02*	P01785	Ig heavy chain V region MOO	6,32/48	4.40/12	18.26	2	16.2
The experimental position of these proteins are indicated by dark full* or dotted** rectangles and dark circles on Figure 5.
1 AC is an accession number from the UniProt database.
2 Exp: Experimental; Theo: Theoretical; pI: Isoelectric point; Mr: Molecular weight; P N°: Peptid number; SC: Sequence coverage.
3 Score is −10*Log (P), where P is the probability that the observed match is a random event.
4 Sequence coverage (%) is based on number of peptide masses matched in UniProt databases.
